# Supplementary material
Source: PubMed Central journal article supplement (PMC3690564)
Supplement: NIHMS460703-supplement-suppl__fig__s3.pdf [file NIHMS460703-supplement-suppl__fig__s3.pdf]

CLOSE

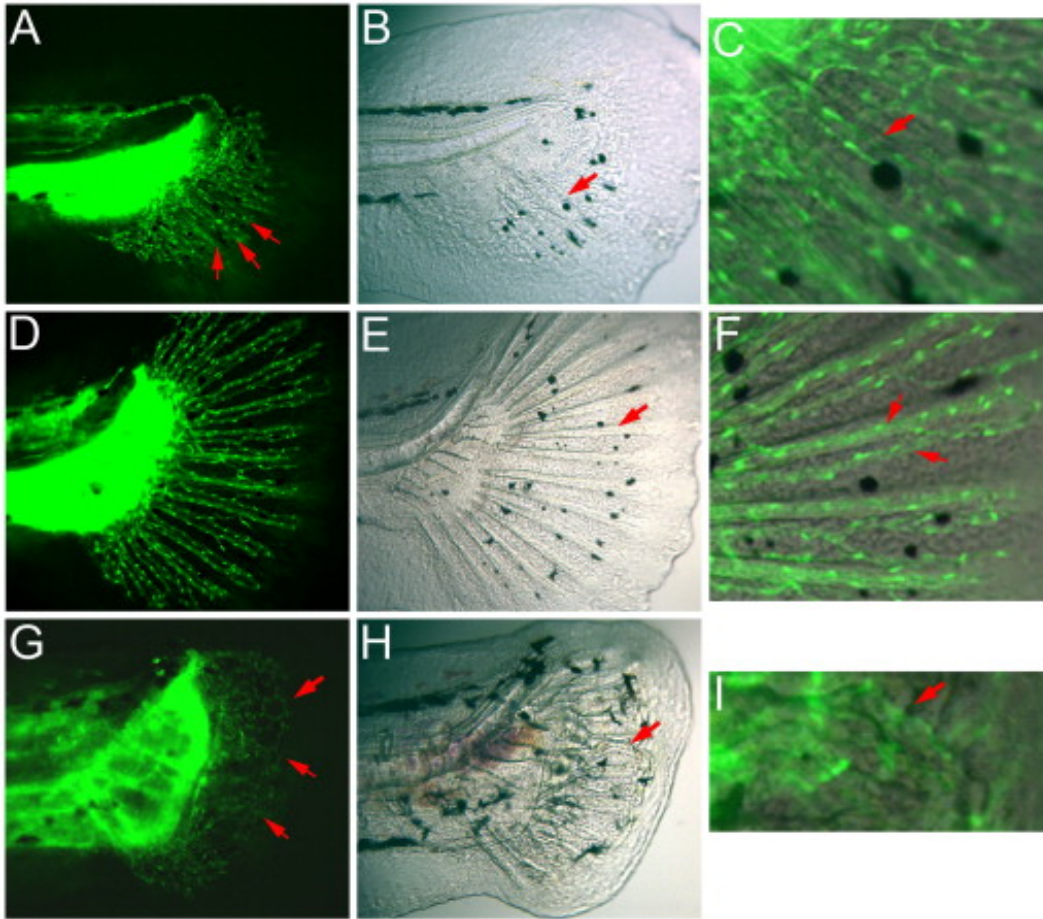

Supplementary Fig. S3. Association of fin rays and blood vessels in young caudal fins. (A–F) Wild-type (WT) young caudal fins. (A) At the early stage of caudal fin development when several radial rays of blood vessel had formed (arrows in A), only a few bony rays are visible (arrow in B). (C) Merged image of the fin ray area of (A) and (B) showing the association of fin rays and blood vessels (arrow). (D) At a later stage when the blood vessels had established the ray pattern, all of the bony rays are now obvious (arrow in E) and closely associated with blood vessels (arrows in the merged image in F). Note that there were only two vessels in each fin ray at this stage of development. (G–I) In the *prp* young caudal fin, the vascular plexus is prominent (arrows in G). Under bright light, the mispatterning of the fin rays is obvious (arrow in H). (I) Close-up of the merged image of the pointed fin ray in (H) showing the curvy fin ray associated with a curved blood vessel (arrow in I).
